# Supplementary material
Source: PubMed Central journal article supplement (PMC6433650)
Supplement: BPH-176-919-s001.pdf [file BPH-176-919-s001.pdf]

## Supplementary materials

**Supplementary Table S1 Information of the antibodies used in the present work**

| Primary antibody  | Source | Dilution | Company                         |
|-------------------|--------|----------|---------------------------------|
| TIGAR             | Rabbit | 1: 500   | Bioworld Technology, USA        |
| p53               | Rabbit | 1: 1000  | Proteintech Group, Chicago, USA |
| Bax               | Rabbit | 1: 1000  | Proteintech Group, Chicago, USA |
| Bcl-2             | Rabbit | 1: 500   | Proteintech Group, Chicago, USA |
| Cleaved-Caspase 3 | Rabbit | 1: 500   | Proteintech Group, Chicago, USA |
| Cleaved-Caspase 9 | Rabbit | 1: 1000  | Proteintech Group, Chicago, USA |
| Cleaved-PARP      | Rabbit | 1:1000   | Proteintech Group, Chicago, USA |
| AKT               | Rabbit | 1: 1000  | Proteintech Group, Chicago, USA |
| p-AKT             | Rabbit | 1: 500   | Bioworld Technology, USA        |
| m-TOR             | Rabbit | 1: 1000  | Proteintech Group, Chicago, USA |
| p-mTOR            | Rabbit | 1: 200   | Bioworld Technology, USA        |
| LC3               | Rabbit | 1: 2000  | Proteintech Group, Chicago, USA |
| Beclin-1          | Rabbit | 1: 1000  | Proteintech Group, Chicago, USA |
| CDK-5             | Rabbit | 1: 1000  | Proteintech Group, Chicago, USA |
| ATM               | Rabbit | 1: 200   | Bioworld Technology, USA        |
| p-ATM             | Rabbit | 1: 100   | Bioworld Technology, USA        |
| GAPDH             | Rabbit | 1: 1000  | Proteintech Group, Chicago, USA |

**Supplementary Table S2 The primer sequences used for real-time PCR assay in the present work.**

| Gene        | Forward primer(5'-3') | Reverse primer(5'-3') |
|-------------|-----------------------|-----------------------|
| TIGAR Rats  | GCTTCAGACGTATATATAGA  | GGGGCTATTCTTGGTAGTAA  |
| TIGAR Human | GGCTTCGGGAAAGGAAATA   | AACCTGGAATAC CGCTGTCT |
| TIGAR mice  | CGGCAGGTCTTAGATAGCTT  | GGCAGCCGGCATCAAAAACA  |

**Supplementary Table S3 IC<sub>50</sub> (μM) values of dioscin against cancer cells**

| Time | HepG2 | SMMC7721 | Huh-7 | BEL-7402 |
|------|-------|----------|-------|----------|
| 12 h | 3.91  | 2.92     | 6.32  | 8.98     |
| 24 h | 3.03  | 2.55     | 4.17  | 6.72     |
| 36 h | 2.33  | 2.21     | 3.76  | 5.85     |

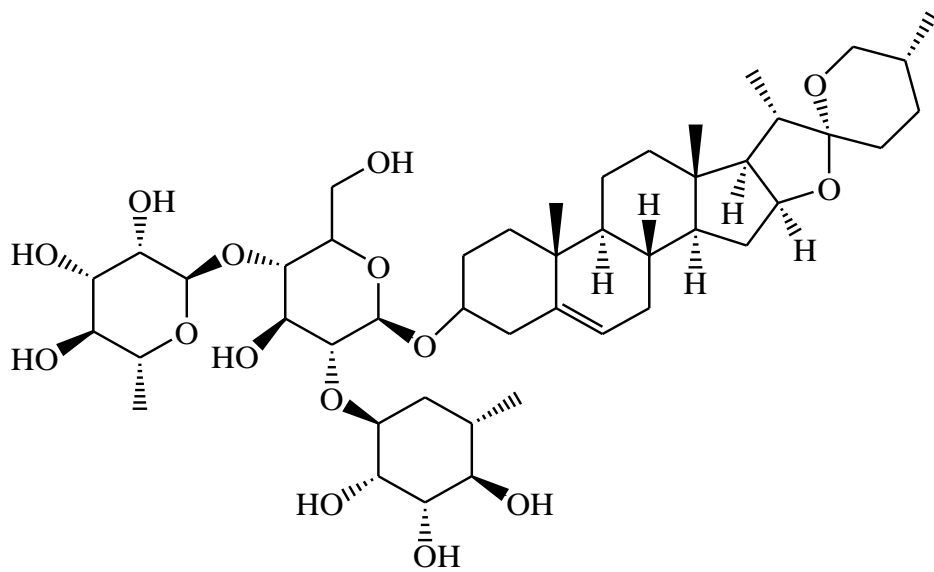

Supplementary Figure S1 Chemical structure of dioscin

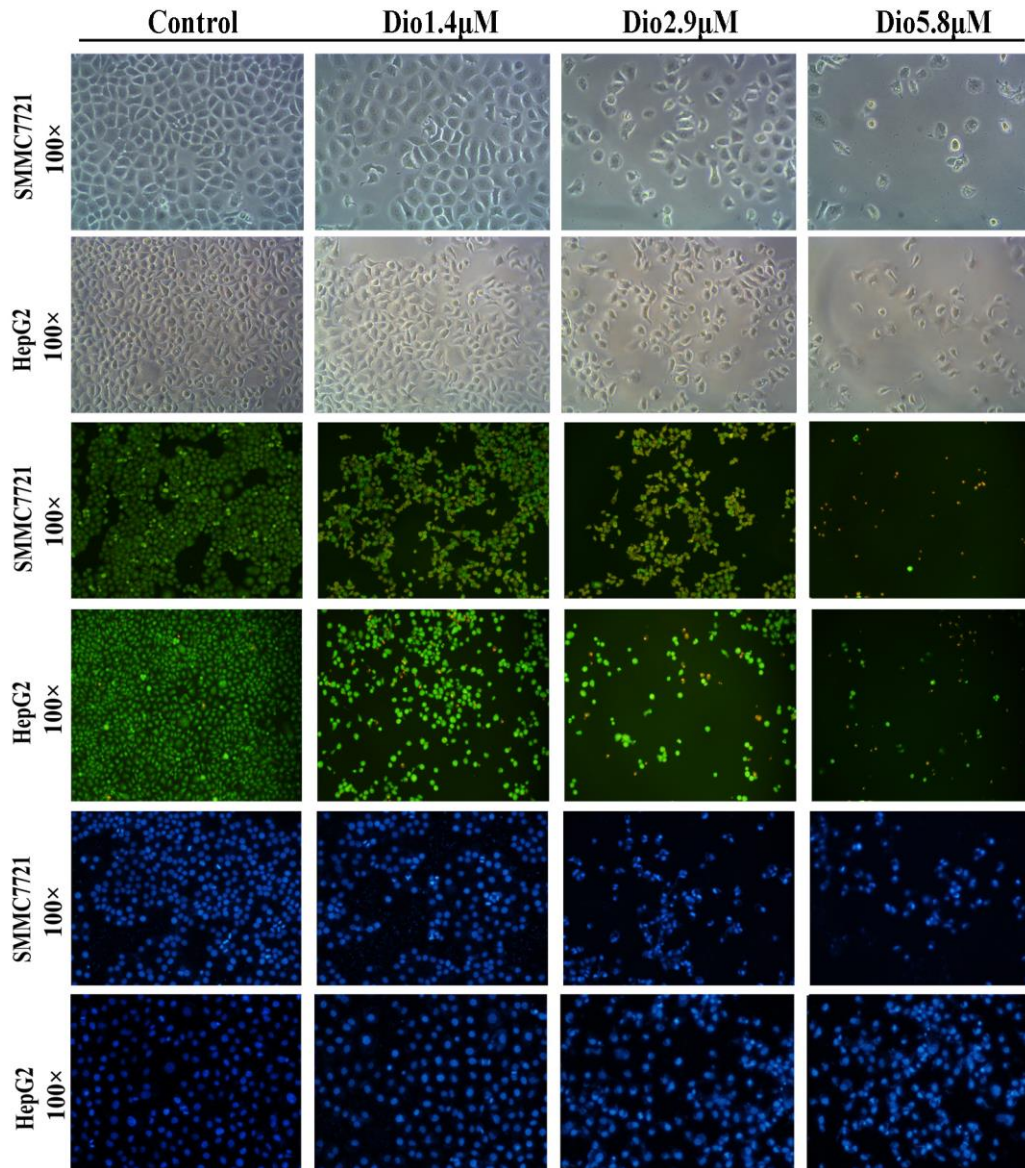

**Supplementary Figure S2** Effects of dioscin on structures and fluorescence images by AO/EB and DAPI staining in SMMC7721 and HepG2 cells.

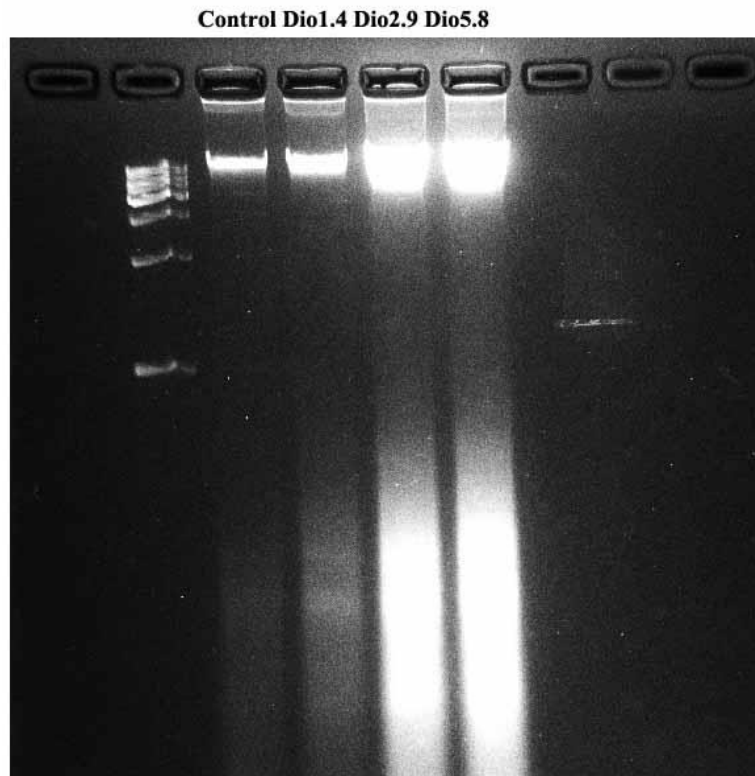

**Supplementary Figure S3** Effects of dioscin on apoptotic cell death in SMMC7721 cells. Fragmentation of DNA was isolated using Agarose gel electrophoresis.

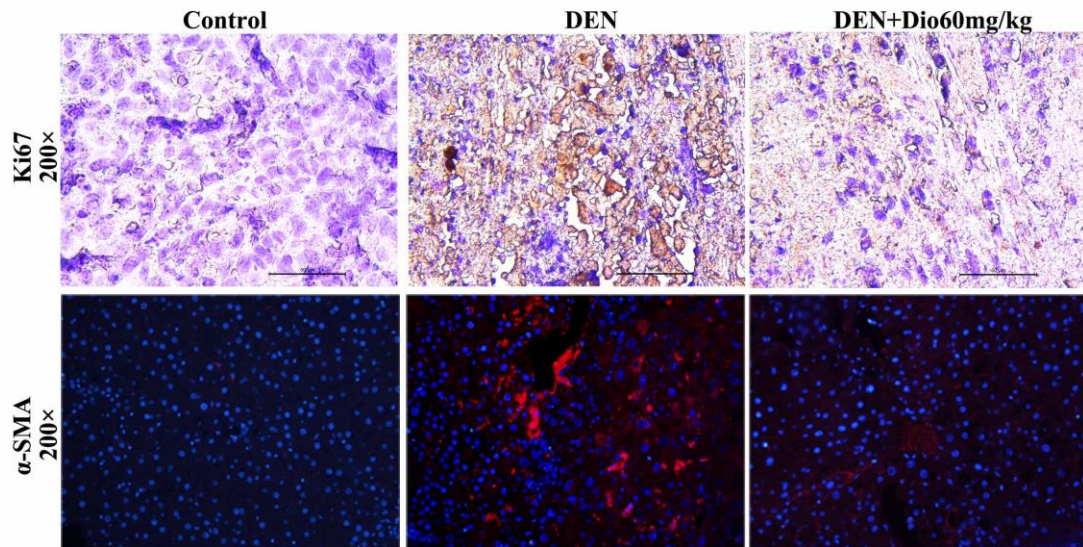

**Supplementary Figure S4** Effects of dioscin on the expression levels of Ki67 and α-SMA in rats.

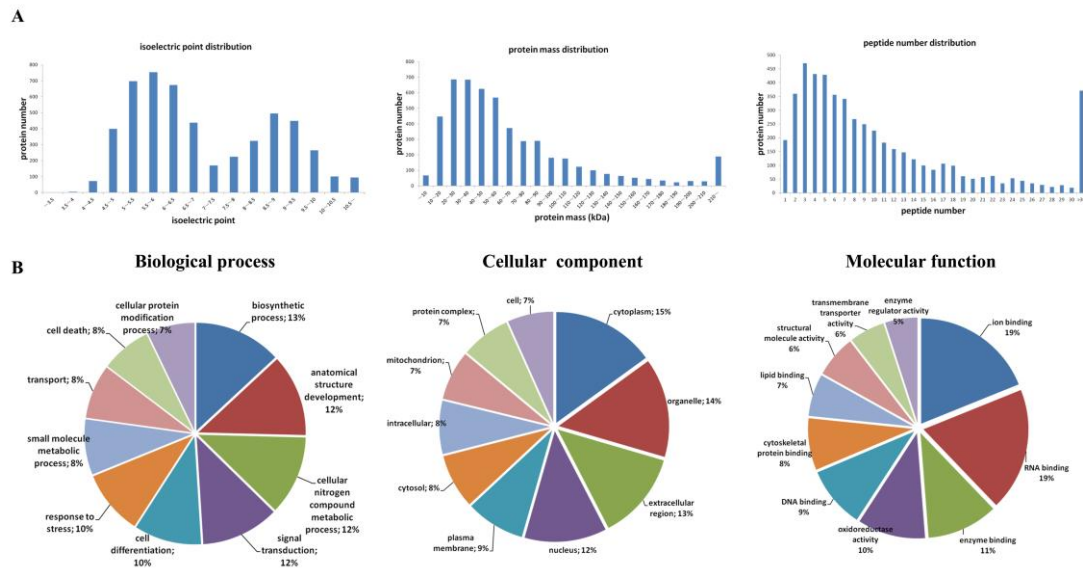

**Supplementary Figure S5 Information and classification of the differentially expressed proteins in SMMC7721 cells caused by dioscin.** (A) The protein mass distribution, peptide length distribution and isoelectric point distribution of the differentially expressed proteins in SMMC7721 cells caused by dioscin. (B) Gene Classification of the differentially expressed proteins identified by proteomics according to the cellular component, molecular function and biological process by Gene Ontology (GO) analysis.



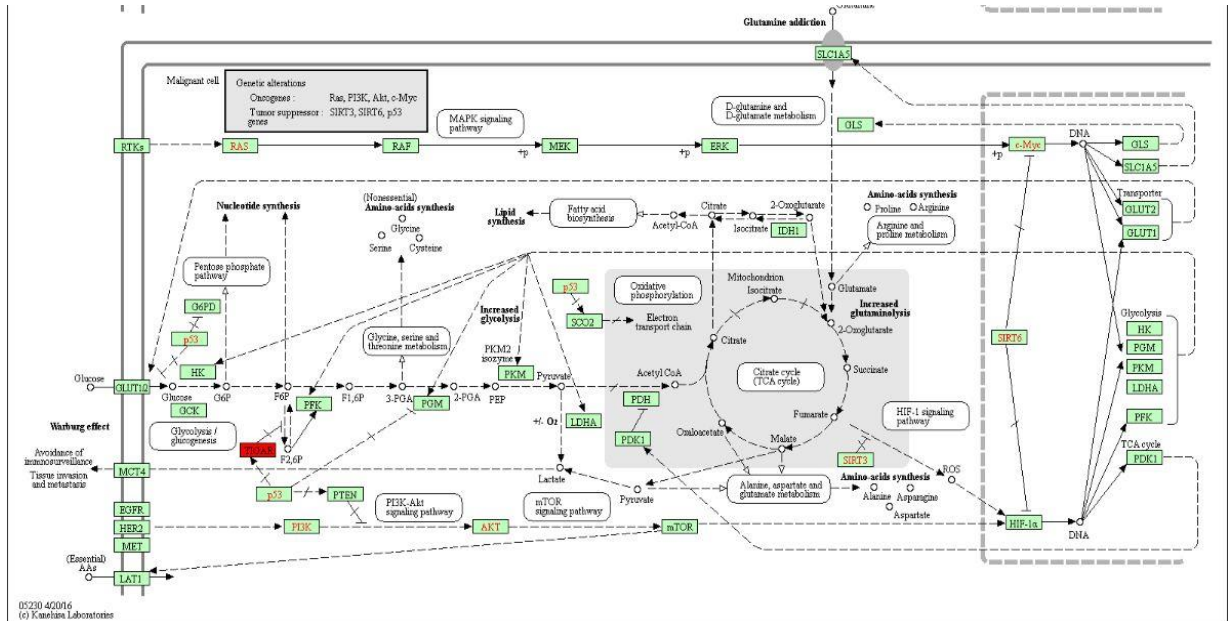

**Supplementary Figure S6 Pathway analysis using the KEGG database.** The map is the central carbon metabolism in cancer pathway and the red proteins in the pathway are identified by iTRAQ-based proteomics from SMMC7721 cells treated with and without dioscin.

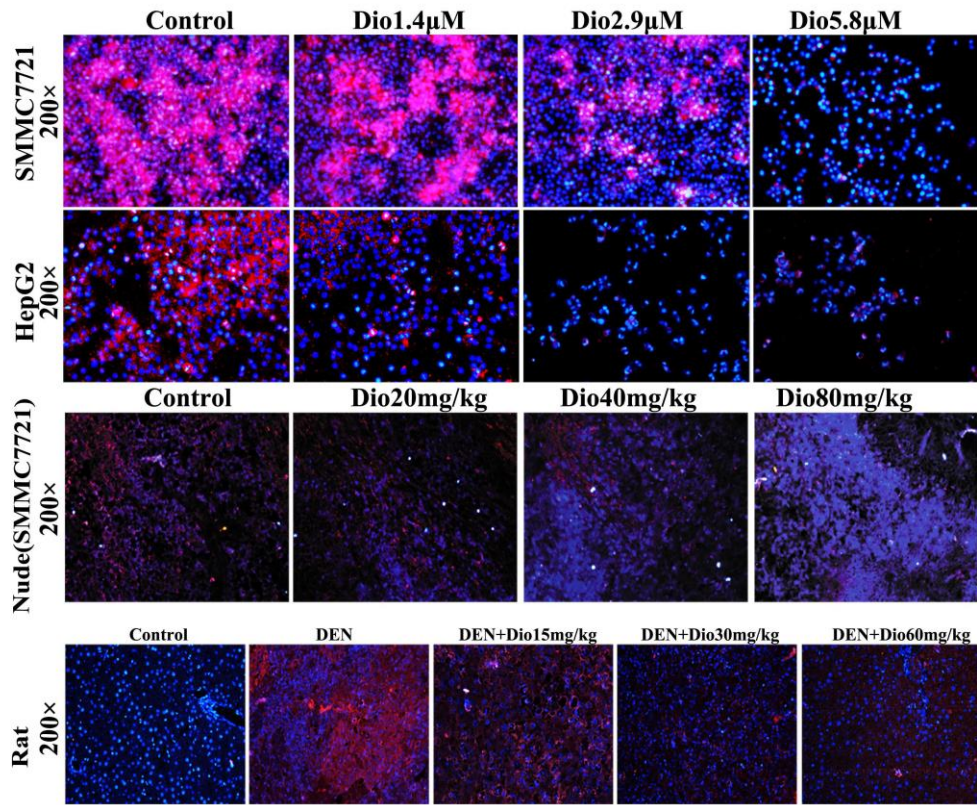

**Supplementary Figure S7** Effects of dioscin on the expression levels of TIGAR based on immunofluorescence assay.

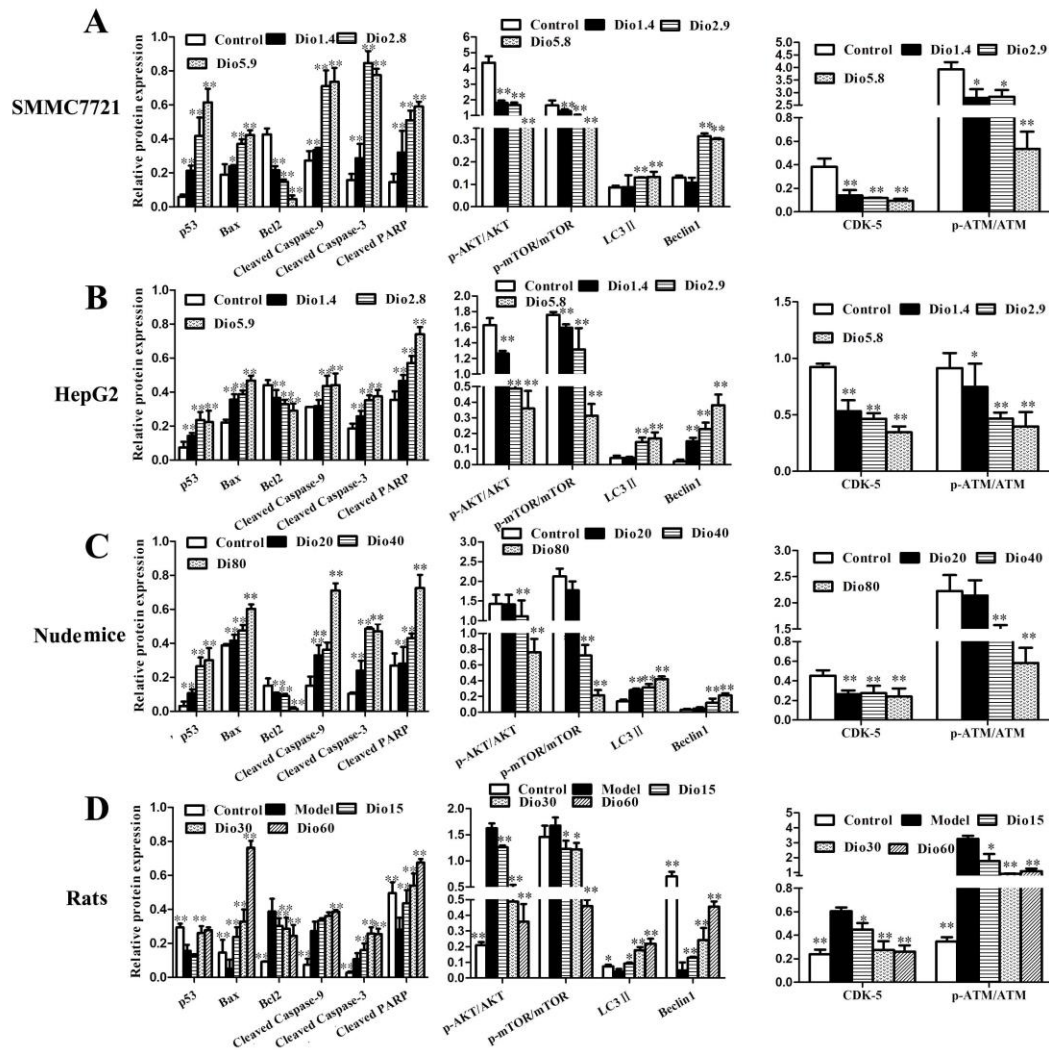

**Supplementary Figure S8** Effects of disocin on the expression levels of the proteins associated with TIGAR-mediated signal pathway *in vitro* and *in vivo*. (A-C).Statistic analysis of the expression levels of the proteins including p53, Bax, Bcl-2, Cleaved PARP Cleaved Caspase-3/9, AKT, p-AKT, mTOR, p-mTOR, LC3, Beclin1, CDK5, ATM, p-ATM in cells and in nude mice. Data are presented as mean  $\pm$  SD (n = 5). \*p < 0.05 versus control group. (D). the expression levels of the proteins including p53, Bax, Bcl-2, Cleaved PARP, Cleaved Caspase-3/9, AKT, p-AKT, mTOR, p-mTOR, LC3, Beclin1, CDK5, ATM, p-ATM in Rats. Data are presented as mean  $\pm$  SD (n = 5). \*p < 0.05 versus model group.

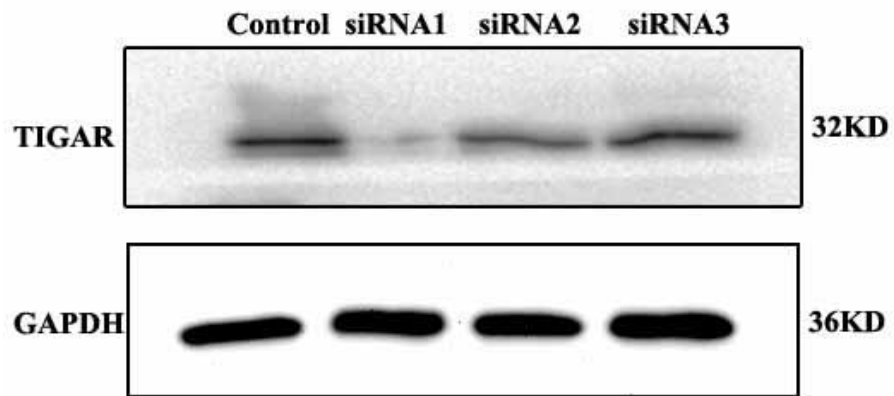

**Supplementary Figure S9** The expression levels of the TIGAR using different siRNAs.

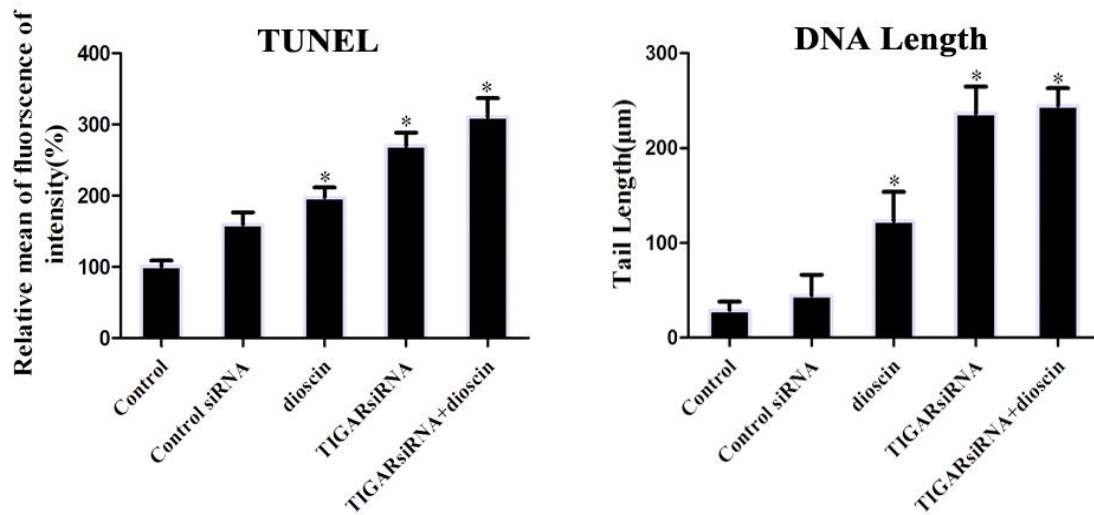

Supplementary Figure S10 Effects of diosicin on cell apoptosis and DNA damage on SMMC7721 cells after TIGAR-siRNA transfection based on TUNEL and comet assays.

All data are expressed as mean  $\pm$  SD (n = 5). \*p < 0.05 versus control group.

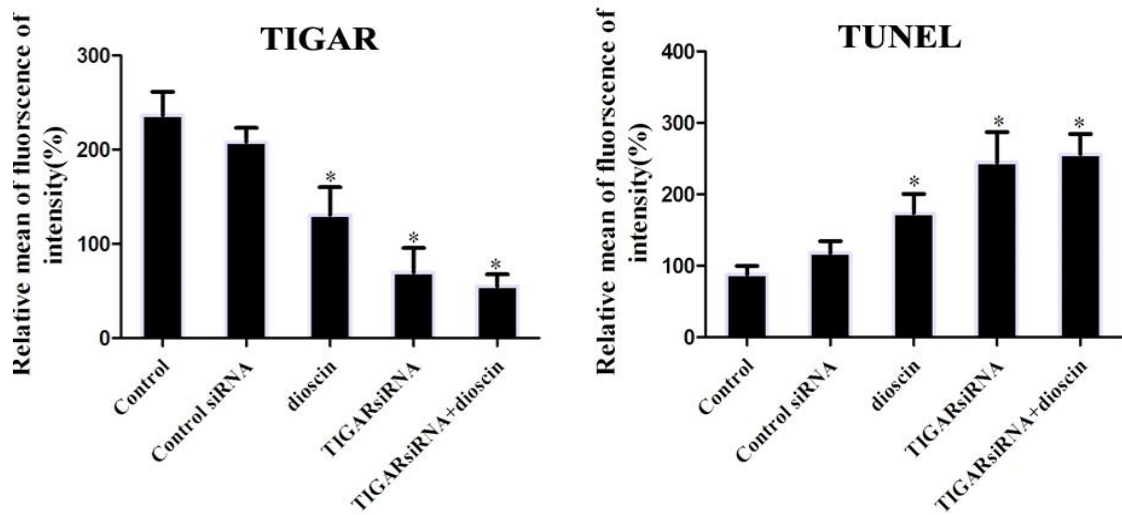

**Supplementary Figure S11** Effects of dioscin on the expression level of TIGAR and cell apoptosis on SMMC7721 cells after TIGAR-siRNA transfection based on immunofluorescence and TUNEL assays. All data are expressed as mean  $\pm$  SD (n = 5). \*p < 0.05 versus control group.

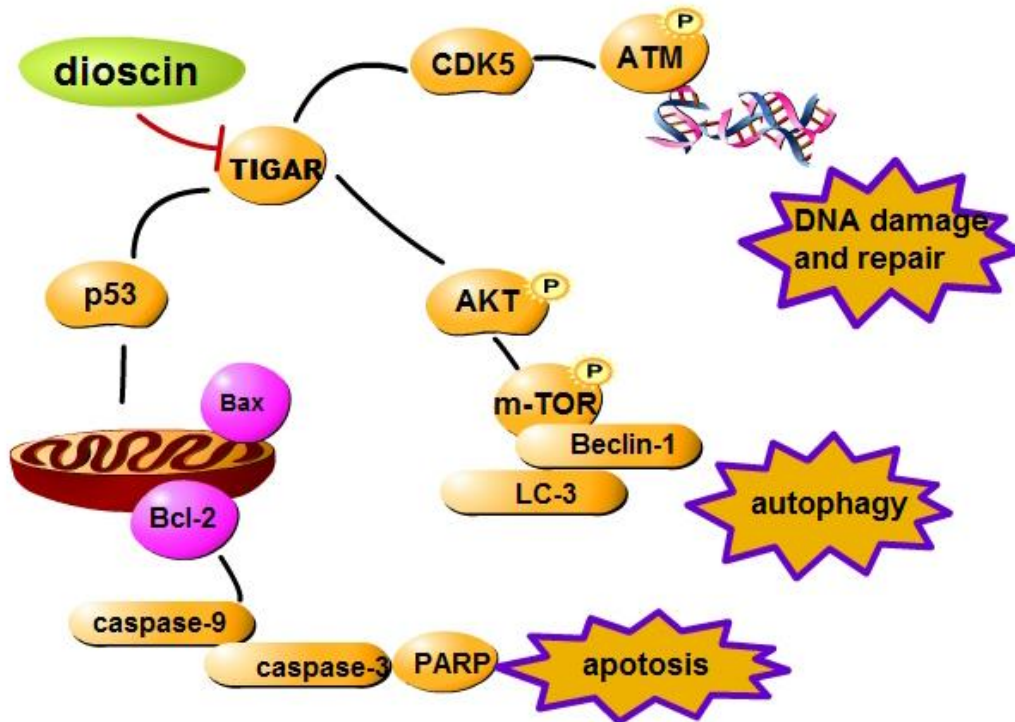

**Supplementary Figure S12 Schematic diagram of the mechanisms of dioscin against HCC.** Dioscin decreased the expression level of TIGAR by regulating p53, AKT/mTOR, CDK5/ATM to cause apoptosis, autophagy and DNA damage.
